# Supplementary figures and images for: How should social mixing be measured: comparing web-based survey and sensor-based methods
Source: Springer Nature journal article supplement (doi:10.1186/1471-2334-14-136), 2014-03-10

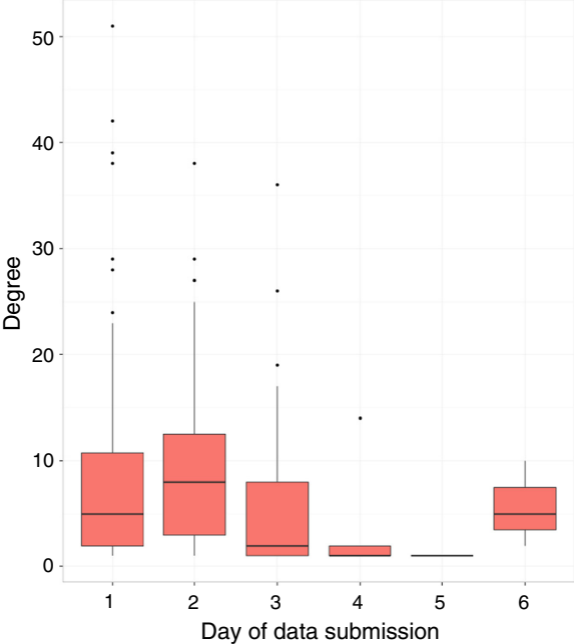

Supplement: 12879_2013_4175_MOESM2_ESM.pdf [file 12879_2013_4175_MOESM2_ESM.pdf]

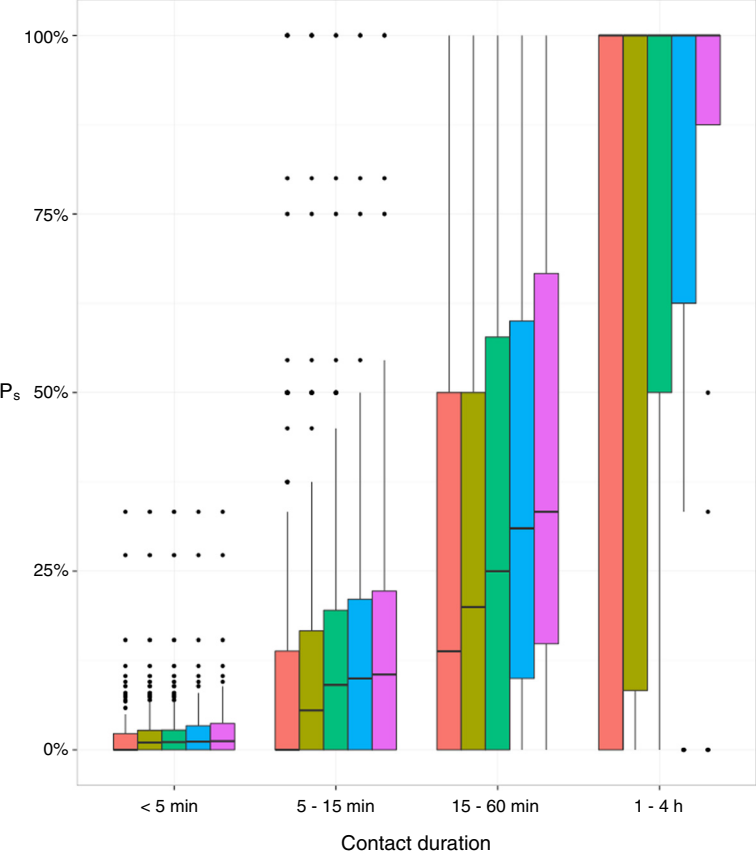

Supplement: 12879_2013_4175_MOESM4_ESM.pdf [file 12879_2013_4175_MOESM4_ESM.pdf]
